# Supplementary material
Source: PubMed Central journal article supplement (PMC4933608)
Supplement: supp_4.2.E316_2015-0088-2-at.pdf [file supp_4.2.E316_2015-0088-2-at.pdf]

## Appendix 2 (as supplied by the authors): Cost of Mechanical Thrombectomy Treatment

**Table A2: Literature Review of Costs for Mechanical Thrombectomy Treatment—Summary**

| Author, Year                          | Mean Hospitalization Cost for Mechanical Thrombectomy                                                                                                                                                                                         | Mean Hospitalization Cost for Control                                      | Currency, Cost Year     | Extra Cost due to Mechanical Thrombectomy treatment <sup>a</sup> (\$CAD 2015) |
|---------------------------------------|-----------------------------------------------------------------------------------------------------------------------------------------------------------------------------------------------------------------------------------------------|----------------------------------------------------------------------------|-------------------------|-------------------------------------------------------------------------------|
| Leppert et al, 2015 (1)               | \$14,405 (additional cost of MT, relative to IVT)                                                                                                                                                                                             | NA                                                                         | USD, 2012               | \$14,572                                                                      |
| Rai et al, 2015 (2)                   | \$23,698 (favourable outcome)<br>\$31,500 (poor outcome)                                                                                                                                                                                      | \$13,688 (favourable outcome)<br>\$20,934 (poor outcome)                   | USD, cost year unclear  | \$12,359 (favourable outcome)<br>\$13,046 (poor outcome)                      |
| Simpson et al, 2014 (3)               | \$35,130                                                                                                                                                                                                                                      | \$25,630                                                                   | USD, 2012               | \$9,610                                                                       |
| Bouvy et al, 2013 (4)                 | €4,171 (additional costs at 6 months IVT relative to conservative treatment, 50% patients used retrievable stent)                                                                                                                             | €971 (additional costs at 6 months IVT relative to conservative treatment) | Euro, 2010              | \$4,558                                                                       |
| Chen, 2012 (5)                        | At least \$10,000 more per patient (estimate)                                                                                                                                                                                                 | Not report explicitly                                                      | USD, 2012               | ≥\$10,116                                                                     |
| Nguyen-Huynh et al, 2011 (6)          | \$19,210 (without SICH)<br>\$28,087 (with SICH)                                                                                                                                                                                               | \$4,686 (without SICH)<br>\$10,245 (with SICH)                             | USD, 2009               | \$17,681 (without SICH)<br>\$21,720 (with SICH)                               |
| Kim et al, 2011 (7)                   | \$20,657 (without SICH)<br>\$29,534 (with SICH)                                                                                                                                                                                               | \$8,408 (without SICH)<br>\$15,945 (with SICH)                             | USD, 2009               | \$14,910 (without SICH)<br>\$16,543 (with SICH)                               |
| Patil et al, 2009 (8)                 | \$24,154                                                                                                                                                                                                                                      | \$6,749                                                                    | USD, 2008               | \$20,349                                                                      |
| University Health Network (UHN), 2015 | \$41,941 (entire episode of care, excluding physician fee)<br>\$16,965 (device)                                                                                                                                                               | NA                                                                         | CAD, 2015               | NA                                                                            |
| Ottawa Hospital, 2015                 | \$10,473 (assuming 1.3 devices per patient)                                                                                                                                                                                                   | NA                                                                         | CAD, 2015               | NA                                                                            |
| Turk et al, 2014 (9)                  | Traditional Penumbra aspiration system with separator: \$33,611 (total); \$7,421 (device)<br>Stent retriever with local aspiration: \$51,599 (total); \$10,263 (device)<br>direct aspiration first-pass technique: \$54,700 (total); \$15,798 | NA                                                                         | USD, 2013               | NA                                                                            |
| Bing et al, 2013 (10)                 | €5,018 (cost of materials, wires, catheters, femoral introducers, carotid stents, et al) or CAD \$6,936                                                                                                                                       | NA                                                                         | Euro, 2010<br>CAD, 2010 | NA                                                                            |

| Author, Year               | Mean Hospitalization Cost for Mechanical Thrombectomy                                                                   | Mean Hospitalization Cost for Control | Currency, Cost Year | Extra Cost due to Mechanical Thrombectomy treatment <sup>a</sup> (\$CAD 2015) |
|----------------------------|-------------------------------------------------------------------------------------------------------------------------|---------------------------------------|---------------------|-------------------------------------------------------------------------------|
| Brinjikji et al, 2011 (11) | \$36,999 (median, with good outcomes)<br>\$50,628 (median, with severe disability)<br>\$35,109 (median, with mortality) | NA                                    | USD, 2008           | NA                                                                            |

Abbreviations: MT, mechanical thrombectomy; IVT, intravenous thrombolysis; SICH, symptomatic intracerebral hemorrhage.

<sup>a</sup>We used historical exchange rates to convert US dollars or Euros to Canadian dollars in the corresponding year. (12) Then, we used the Consumer Price Index to adjust costs to 2015 Canadian dollars. (13)

### References:

- (1) Leppert MH, Campbell JD, Simpson JR, Burke JF. Cost-Effectiveness of Intra-Arterial Treatment as an Adjunct to Intravenous Tissue-Type Plasminogen Activator for Acute Ischemic Stroke. *Stroke*. 2015.
- (2) Rai AT, Evans K. Hospital-based financial analysis of endovascular therapy and intravenous thrombolysis for large vessel acute ischemic strokes: The 'bottom line'. *J Neurointerv Surg*. 2015;7(2):150-6.
- (3) Simpson KN, Simpson AN, Mauldin PD, Hill MD, Yeatts SD, Spilker JA, et al. Drivers of costs associated with reperfusion therapy in acute stroke: The interventional management of stroke III trial. *Stroke*. 2014;45(6):1791-8.
- (4) Bouvy JC, Franssen PS, Baeten SA, Koopmanschap MA, Niessen LW, Dippel DW. Cost-effectiveness of two endovascular treatment strategies vs intravenous thrombolysis. *Acta Neurol Scand*. 2013;127(5):351-9.
- (5) Chen M. Cost-effectiveness of endovascular therapy for acute ischemic stroke. *Neurology*. 2012;79(SUPPL. 1):S16-S21.
- (6) Nguyen-Huynh MN, Johnston SC. Is mechanical clot removal or disruption a cost-effective treatment for acute stroke? *AJNR Am J Neuroradiol*. 2011;32(2):244-9.
- (7) Kim AS, Nguyen-Huynh M, Johnston SC. A cost-utility analysis of mechanical thrombectomy as an adjunct to intravenous tissue-type plasminogen activator for acute large-vessel ischemic stroke. *Stroke*. 2011;42(7):2013-8.
- (8) Patil CG, Long EF, Lansberg MG. Cost-effectiveness analysis of mechanical thrombectomy in acute ischemic stroke. *J Neurosurg*. 2009;110(3):508-13.
- (9) Turk AS, Turner R, Spiotta A, Vargas J, Holmstedt C, Ozark S, et al. Comparison of endovascular treatment approaches for acute ischemic stroke: cost effectiveness, technical success, and clinical outcomes. *J Neurointerv Surg*. 2014.
- (10) Bing F, Jacquin G, Poppe A, Roy D, Raymond J, Weill A. The cost of materials for intra-arterial thrombectomy. *Interv Neuroradiol*. 2013;19(1):83-6.
- (11) Brinjikji W, Kallmes DF, Rabinstein AA, Lanzino G, Cloft HJ. Hospitalization costs for patients with acute ischemic stroke treated with endovascular embolectomy in the United States. *Stroke*. 2011;42(11):3271-3.
- (12) Canadian Forex Foreign Exchange Services. Yearly Average Exchange Rates [Internet]. 2015 [cited 2015. Available from: <http://www.canadianforex.ca/forex-tools/historical-rate-tools/yearly-average-rates>
- (13) Statistics Canada. Consumer Price Index, health and personal care [Internet]. Statistics Canada; 2015 [Available from: <http://www.statcan.gc.ca>
