# Supplementary material
Source: PubMed Central journal article supplement (PMC4933608)

### Appendix 3 (as supplied by the authors): Validation of Economic Model

The plots of the health state probabilities (i.e. the probabilities of functional independence, disability and mortality over time) following mechanical thrombectomy plus intravenous thrombolysis and intravenous thrombolysis alone based on our Markov model are shown in Figures A3-1 and A3-2. These plots reflect our model inputs and assumptions, and assume that the model captures the different health state probabilities appropriately.

**Figure A3-1: Health State Probabilities Following Mechanical Thrombectomy plus Intravenous Thrombolysis**

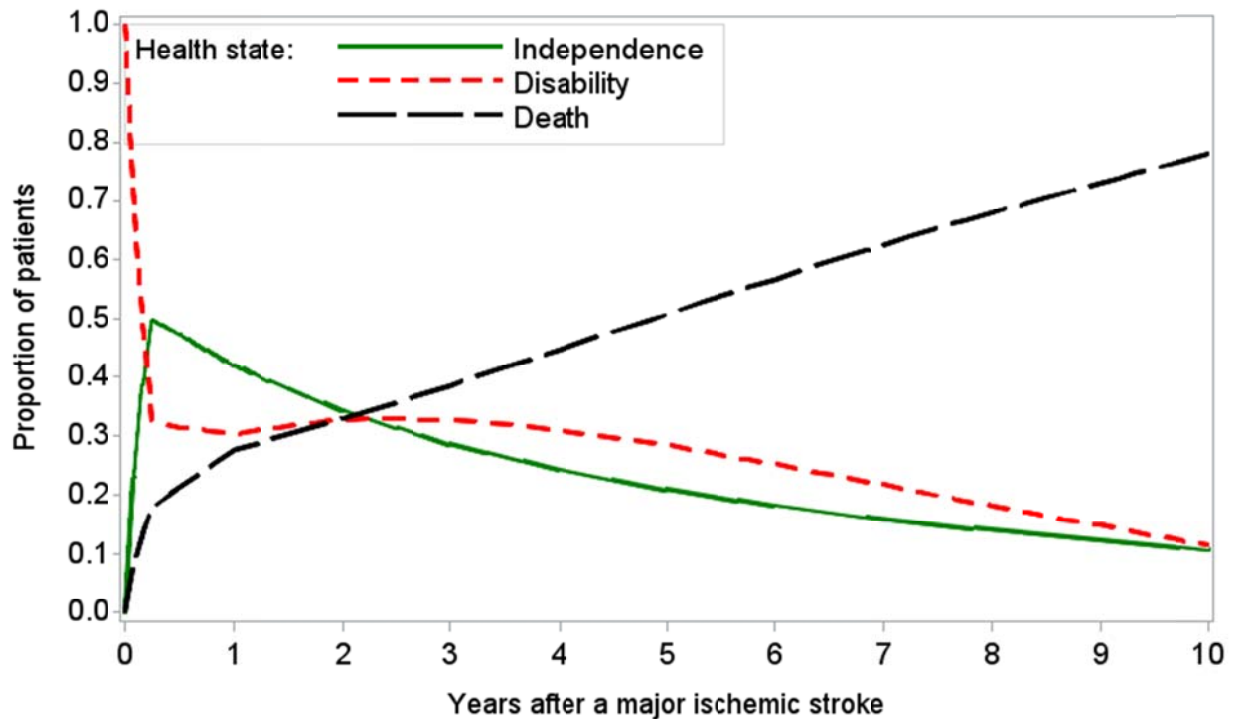

Figure A3-2: Health State Probabilities Following IVT Alone

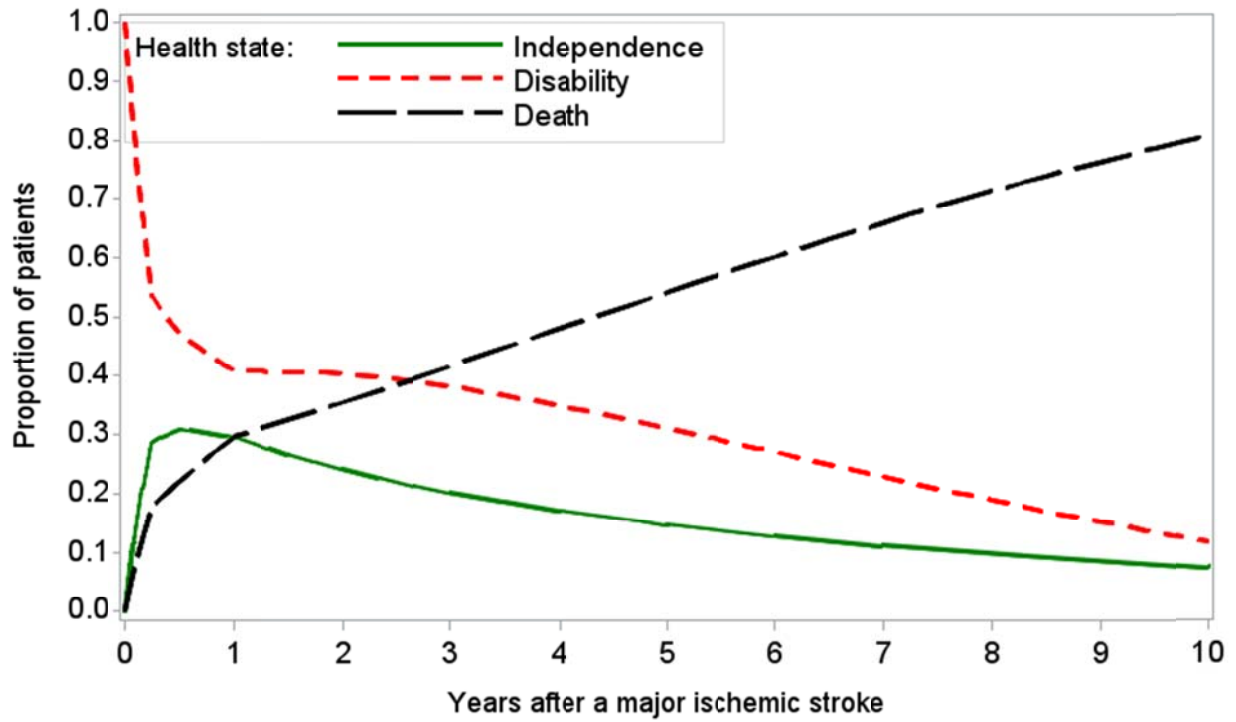

Supplement: supp_4.2.E316_2015-0088-3-at.pdf [file supp_4.2.E316_2015-0088-3-at.pdf]
