# Supplementary material
Source: PubMed Central journal article supplement (PMC4933608)

**Appendix 4 (as supplied by the authors): Incremental Cost Effectiveness Ratio (ICER) by Follow-up Time**

**Figure A4: Sensitivity Analysis Examining ICER by Follow-up Time, Mechanical Thrombectomy plus Intravenous Thrombolysis versus Intravenous Thrombolysis Alone**

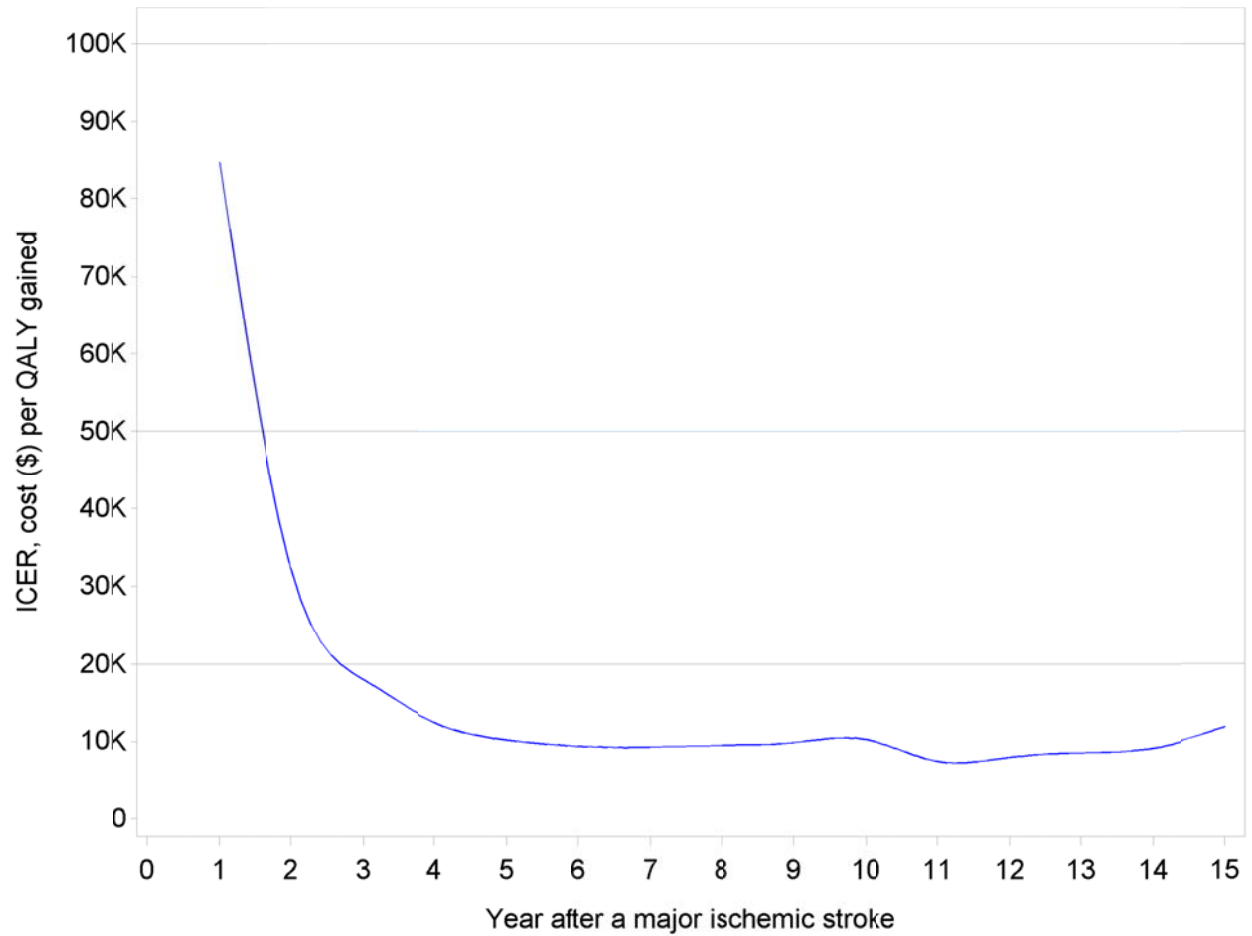

Supplement: supp_4.2.E316_2015-0088-4-at.pdf [file supp_4.2.E316_2015-0088-4-at.pdf]
