# Supplementary material
Source: PubMed Central journal article supplement (PMC4933608)
Supplement: supp_4.2.E316_2015-0088-5-at.pdf [file supp_4.2.E316_2015-0088-5-at.pdf]

Appendix 5 (as supplied by the authors): Cost-Effectiveness Acceptability Curve

Figure A5: Cost-Effectiveness Acceptability Curve: Mechanical Thrombectomy plus Intravenous Thrombolysis versus Intravenous Thrombolysis Alone

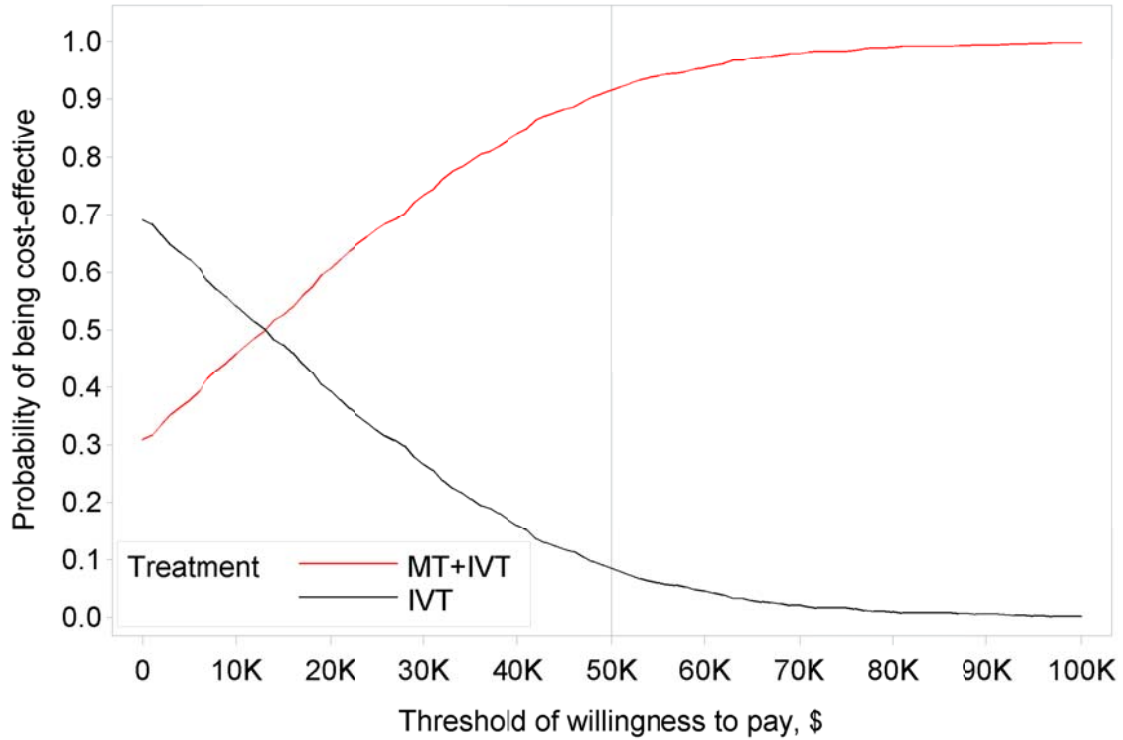

Abbreviations: MT, mechanical thrombectomy; IVT, intravenous thrombolysis.
